# Supplementary material for: Polydopamine-coated cerium oxide core–shell nanoparticles for efficient and non-damaging chemical–mechanical polishing
Source: Royal Society of Chemistry journal article supplement (doi:10.1039/d4dt03546a), 2025-01-01
Supplement: d4dt03546a1.pdf [file d4dt03546a1.pdf]

# Supplementary Information

## **Polydopamine-coated cerium oxide core-shell nanoparticles for efficient and non-damaging chemical-mechanical polishing**

Xiaohai He,<sup>a</sup> Bo Gao,<sup>a</sup> Qingyuan Wu,<sup>b</sup> Chengrui Xin,<sup>a</sup> Junjie Xue,<sup>a</sup>

Fangwei Lu,<sup>a</sup> Xin-Ping Qu,<sup>c</sup> Simin Li,<sup>\*a</sup> Fan Zhang,<sup>\*a</sup> Hui Shen<sup>\*a</sup>

<sup>a</sup>The College of Energy Materials and Chemistry, Inner Mongolia University, Hohhot 010021, China.

<sup>b</sup>New Cornerstone Science Laboratory, State Key Laboratory for Physical Chemistry of Solid Surfaces, Collaborative Innovation Center of Chemistry for Energy Materials, and National & Local Joint Engineering Research Center of Preparation Technology of Nanomaterials, College of Chemistry and Chemical Engineering, Xiamen University, Xiamen 361005, China.

<sup>c</sup>School of Microelectronics, Fudan University, Shanghai, 200433, China.

Email: shen@imu.edu.cn (H.S.); siminli@imu.edu.cn (S.L.)

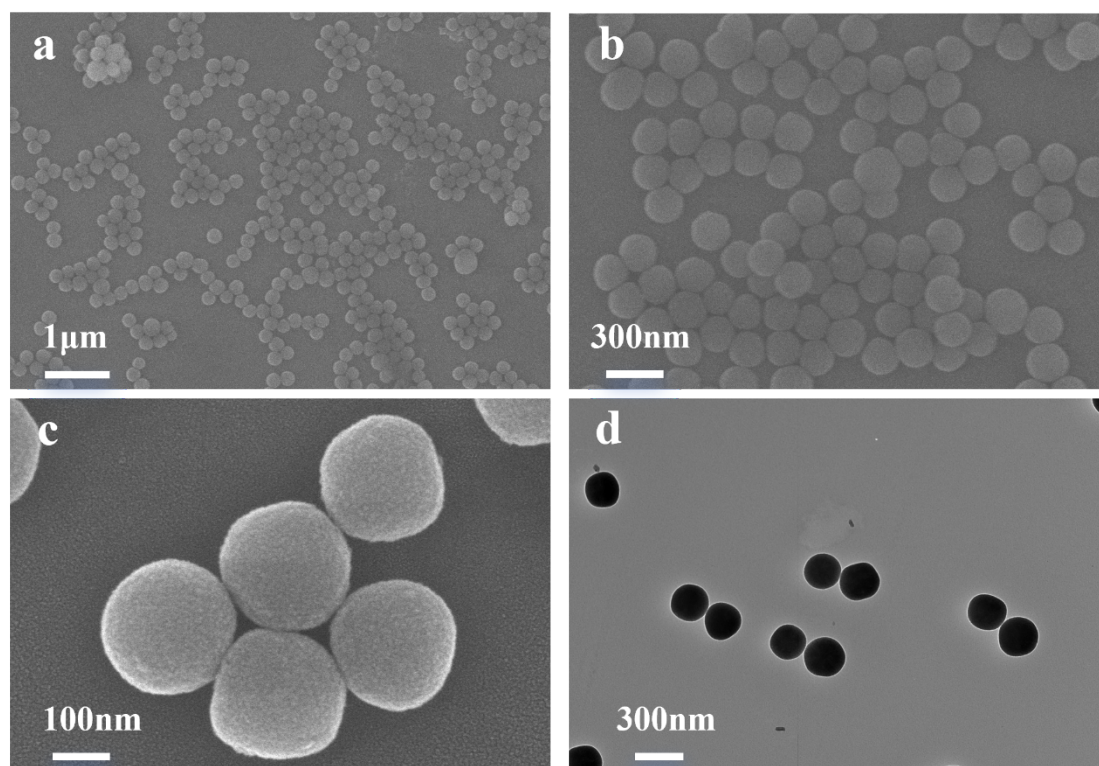

**Figure S1.** SEM and TEM images of the SiO<sub>2</sub> nanospheres prepared by the *Stöber* method. The SEM and TEM images reveal that the SiO<sub>2</sub> nanospheres (ca. 240 nm in diameter) exhibit a uniform and relatively smooth spherical morphology over a wide scope.

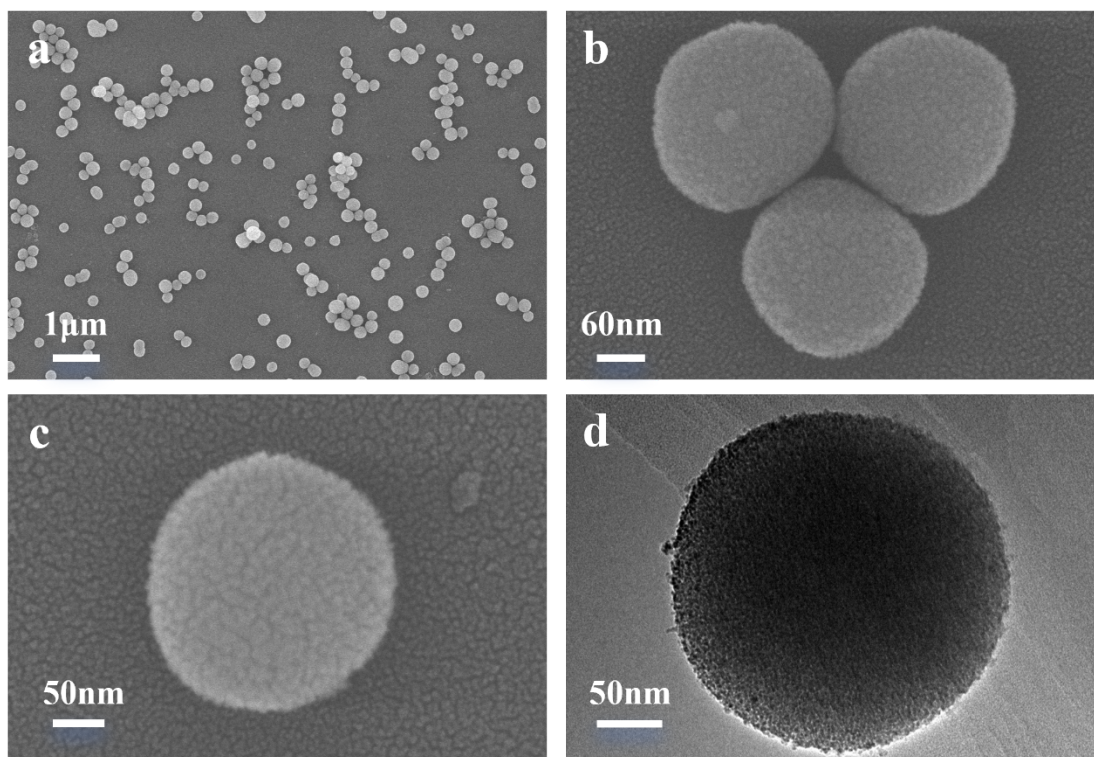

**Figure S2.** SEM and TEM images of the  $\text{SiO}_2@\text{CeO}_2$  composite abrasives.

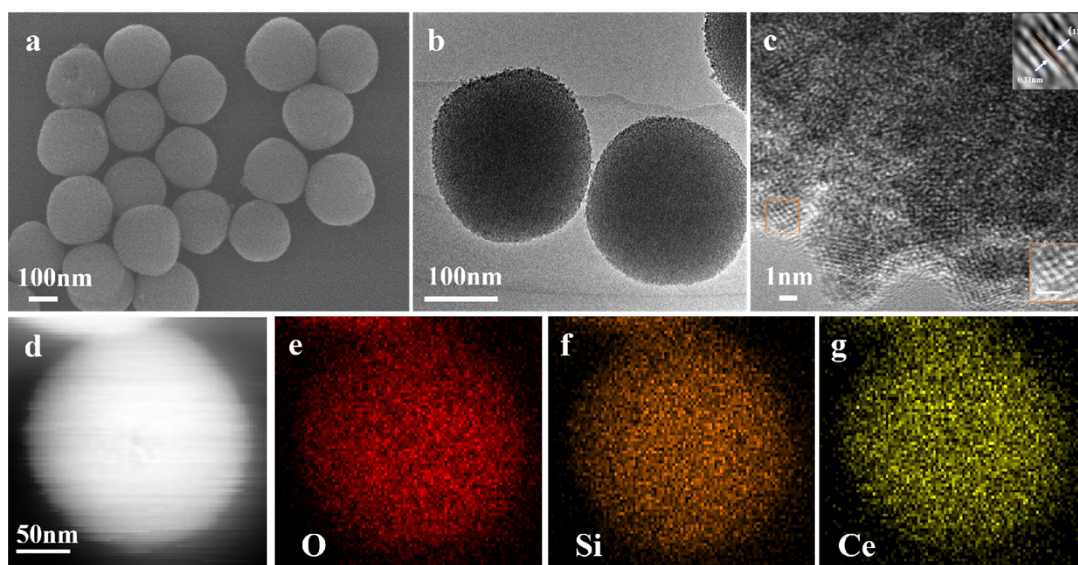

**Figure S3.** SEM (a), low- and high-resolution TEM (b, c) images of the  $\text{SiO}_2@\text{CeO}_2$  composite abrasives, which show the anisotropic growth of the lattice orientation along the (111) crystal plane in different regions. High-angle annular darkfield scanning TEM (HAADF-STEM) image (d) and energy dispersive X-ray spectroscopy (EDS) elemental mapping images of O (e), Si (f), Ce (g) of  $\text{SiO}_2@\text{CeO}_2$  composite abrasives.

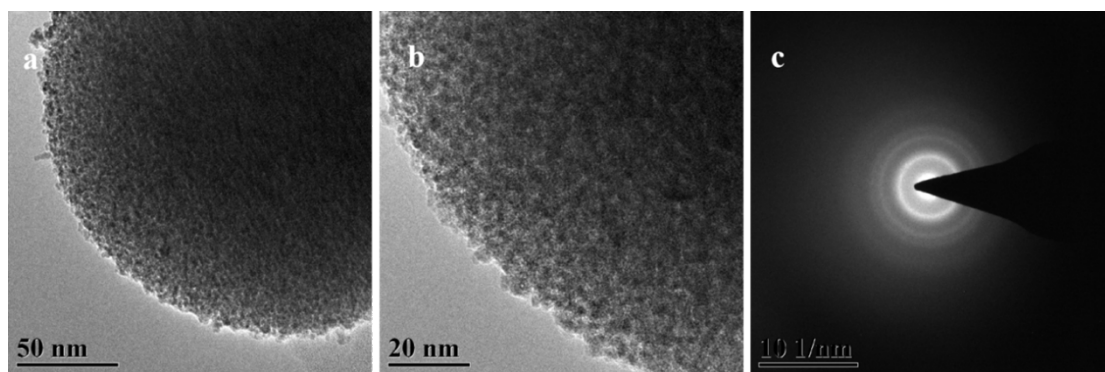

**Figure S4.** (a, b) HR-TEM images of the SiO<sub>2</sub>@CeO<sub>2</sub> composite abrasives at different magnifications. (c) Lattice and selected electron diffraction patterns of the SiO<sub>2</sub>@CeO<sub>2</sub> composite abrasives. No well-resolved diffraction rings can be observed in the high-resolution transmission electron microscopy (HRTEM) image and SAED pattern indicating the amorphous characteristics of such monodisperse SiO<sub>2</sub>@CeO<sub>2</sub> composite abrasives.

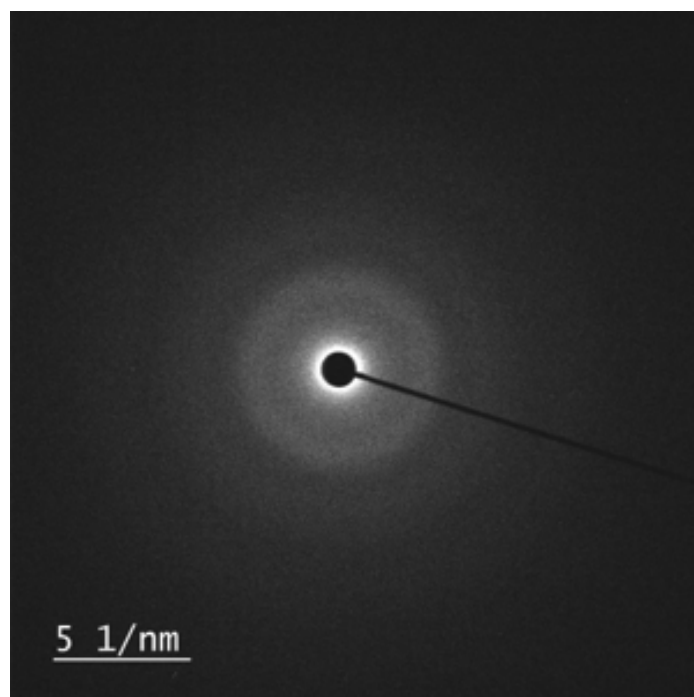

**Figure S5.** Selected area electronic diffraction (SAED) pattern, indicating the amorphous characteristics of such monodisperse  $\text{SiO}_2@\text{CeO}_2@\text{PDA}$  composite abrasives.

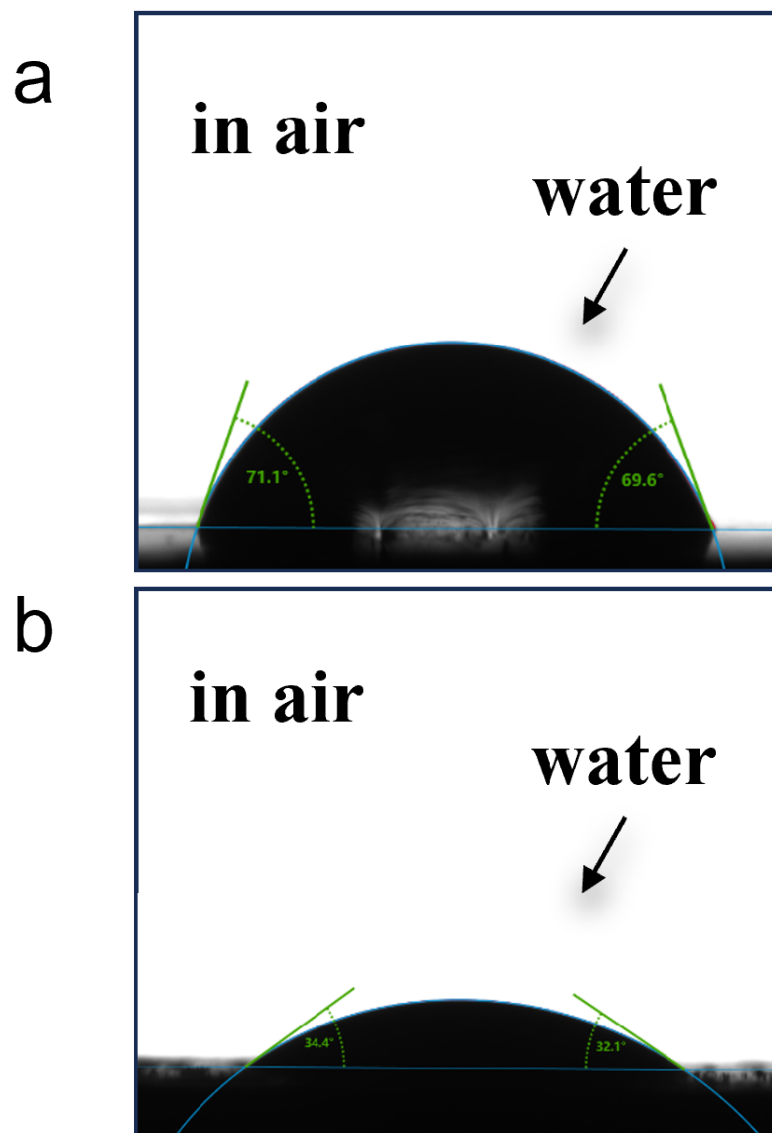

**Figure S6.** The contact angle (CA) of SiO<sub>2</sub>@CeO<sub>2</sub> (a) and SiO<sub>2</sub>@CeO<sub>2</sub>@PDA (b) composite abrasives on the SiO<sub>2</sub> wafer. The results showed that the hydrophilicity of the dopamine-modified abrasives was significantly enhanced.

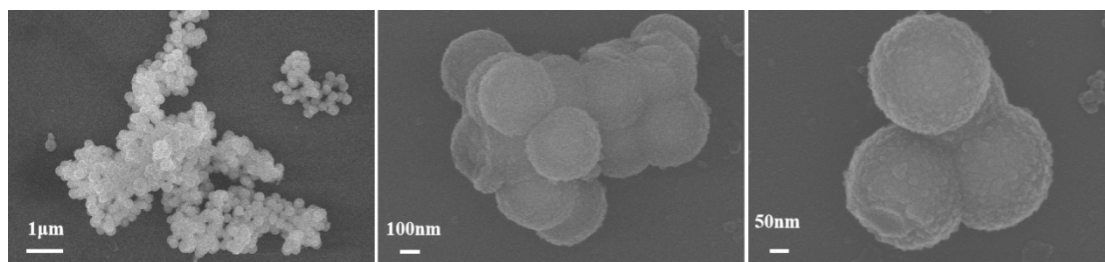

**Figure S7.** SEM(a), (b), (c) images of the  $\text{SiO}_2@\text{CeO}_2@\text{PDA}$  (16h) composite abrasives at different magnifications. While the reaction time was increased to 16 h, the further disordered growth of PDA resulted in serious abrasive agglomeration.
